## **Psip1/p52 regulates distal *Hoxa* genes through activation of lncRNA Hottip**

Madapura M Pradeepa<sup>1 2\*</sup>, Gillian Taylor<sup>1</sup>, Graeme R Grimes<sup>1</sup>, Andrew J Wood<sup>1</sup>, and  
Wendy A Bickmore<sup>1\*</sup>

<sup>1</sup> MRC Human Genetics Unit, MRC Institute of Genetics and Molecular Medicine  
at University of Edinburgh, Crewe Road, Edinburgh UK

<sup>2</sup> School of biological sciences, University of Essex, Wivenhoe Park, Colchester, UK  
□

\*Correspondence to: M.M.P or W.A.B.

Email: pmadap@essex.ac.uk

Wendy.Bickmore@igmm.ed.ac.uk

**Keywords:** Psip1, LncRNA, Hottip, Hox,

**Running title:** Psip1/p52 regulates Hox genes through lncRNA

### **Competing Interests**

The authors declare no competing interests.

## Abstract

Long noncoding RNAs (lncRNAs) have been implicated in various biological functions including regulation of gene expression, X-inactivation, imprinting, cell proliferation and differentiation. However, the functionality of lncRNAs is not clearly understood and conflicting conclusions have often been reached when comparing different methods to investigate them. Moreover, little is known about the upstream regulation of lncRNAs. Here we show that a transcriptional co activator – PC4 and SF2 interacting protein (Pisip1)/p52, which is involved in linking transcription to RNA processing, regulates the expression of the lncRNA *Hottip*. Using complementary approaches – knockdown, Cas9 mediated lncRNA deletion, analysis of lncRNA binding by Chromatin isolation by RNA purification (ChIRP) - we demonstrate that *Hottip* binds to the 5' Hoxa genes located in cis, which leads to their upregulation. Moreover, the synthetic activation of *Hottip* is sufficient to induce the expression of polycomb repressed *Hox* genes in mouse embryonic stem cells (mESCs).

## Introduction

The mammalian genome encodes ~10,000 long noncoding RNAs (lncRNAs)<sup>1</sup>. Although very few of these molecules have been functionally characterised, a small number have been shown to function by binding to various protein complexes to regulate gene expression<sup>2-7</sup>. Some lncRNAs have been reported to affect gene expression *in trans*<sup>8,9</sup>, whereas others, such as Kcnq1ot1, Xact, Xist and Tsix, function *in cis* (reviewed in<sup>10</sup>). Other lncRNAs likely function in the cytoplasm through binding to other regulatory RNAs, e.g. miRNA<sup>11</sup>.

It has also been difficult to distinguish whether lncRNA function is conferred by the process of transcription or by the RNA molecule itself. Concerns have been raised with respect to limitations and discrepancies in various methodologies used to study lncRNA function<sup>12</sup> and contrasting conclusions have often been reached when comparing knockdown and knockout studies<sup>13-15</sup>.

With the exception of relatively well characterized lncRNAs like Xist<sup>16</sup>, H19<sup>17,18</sup> and Kcnq1ot1<sup>19,20</sup>, many recently described lncRNAs lack genetic evidence to support their function *in vivo*. Indeed, recent efforts to phenotype mouse knockouts for 18 lncRNA genes identified only 5 with strong phenotypes<sup>21</sup>. With the list of lncRNAs with unknown function increasing, there is a pressing need to rigorously dissect the functional mechanisms of individual lncRNA locus. Additionally, most research has focused on the downstream functions of lncRNAs and, with the exception of lncRNAs involved in imprinting and dosage compensation, little is known about the transcriptional regulation of lncRNAs themselves. The promoters of lncRNA genes are conserved, and are enriched for homeobox domain containing transcription factor binding sites<sup>22</sup>.

Mammalian *Hox* loci are important model systems for the investigation of lncRNA functions. Many noncoding RNAs within *Hox* clusters are expressed tissue specifically<sup>23-27</sup>, and have indeed been linked to the regulation of *Hox* mRNA genes<sup>8,13,28,29</sup>. At the *Hoxa* cluster, the *IncHoxa1/Halr* - also known as *Haunt* ~ 50 kb away from 3' end of *Hoxa* (Fig 1a) has been shown to repress *Hoxa1* expression *in cis*<sup>30</sup>. Importantly, a recent study demonstrated that *Haunt* lncRNA plays distinct role as a repressor while its DNA sequence functions as an enhancer for *Hoxa* genes<sup>14</sup>. *HOTAIRM*, located between *Hoxa1* and *Hoxa2*, is expressed antisense to coding *Hoxa* genes, and is implicated in retinoic acid induced activation of *HOXA1* and *HOXA4* during myeloid differentiation<sup>31</sup>. *HOTTIP* lncRNA is transcribed in an antisense direction from the 5' end of *Hoxa13* (Fig 1a), and is reported to be important for targeting MLL through interaction with WDR5 to maintain 5' *HOXA* expression in distal tissues<sup>3</sup>.

PC4 and SF2 interacting protein (Psp1) also known as LEDGF/p75 has been shown to be important for regulation of *Hox* genes *in vivo*<sup>32</sup>. We demonstrated the role of the p75 isoform of Psp1/p75 in recruiting Mll to expressed *Hox* genes<sup>33</sup>. The alternatively spliced short isoform of Psp1 (Psp1/p52) lacks the C-terminal Mll or integrase binding domain (IBD), but shares the chromatin binding PWWP and AT hook like domains at the N-terminus. Psp1/p52 binds to H3K36 trimethylated (H3K36me3) nucleosomes via the PWWP domain and can modulate alternative splicing by recruiting splicing factors to H3K36me3<sup>34</sup>.

Here, we demonstrate the role of Psp1/p52 in regulating expression of 5' *Hoxa* genes and we show that it functions by activating expression of the *Hottip* lncRNA. Knockdown of either Psp1/p52 or *Hottip* leads to reduced expression of 5' *Hox* genes - *Hoxa13*, *Hoxa11* and *Hoxa10*. Using CRISPR-Cas9 mediated deletion

versus dCas9-VP160 mediated transcriptional activation, we demonstrate the function of Hottip lncRNA transcription in *Hox* regulation and the direct role of Psp1/p52 in activating lncRNA Hottip, which further maintains 5' *Hoxa* expression.

## Results

### **Psp1 is required for expression of lncRNA Hottip**

In mammals, active *Hox* genes are maintained by complexes containing the MLL (Mix lineage leukemia) histone H3K4 methyltransferases, and repression is maintained by Polycomb (PcG) complexes<sup>35</sup>. We recently demonstrated a role for Psp1/p75 in recruiting Mll to expressed genes from the 5' end of *Hoxa*<sup>33</sup>. Most strikingly, at the extreme 5' end of *Hoxa*, beyond *Hoxa13*, where the Hottip lncRNA<sup>3</sup> is located, Mll1 binding is completely lost in *Psp1*<sup>-/-</sup> MEFs compared to wild type (WT), this is accompanied by a concurrent loss of H3K4me3 and Menin - a common component of Mll1 and Mll2<sup>36</sup> (Fig. 1a). Loss of Psp1 also results in a complete loss of *Hottip* expression and reduced expression of *Hoxa13*, which has been described as a target of Hottip (Fig.1b)<sup>3</sup>. In contrast, other previously described Hottip target genes – *Hoxa9*, *a10*, and *a11*<sup>3</sup> are up-regulated in *Psp1*<sup>-/-</sup> MEFs despite the loss of *Hottip* expression<sup>33</sup>. Nascent run-on analysis shows that these effects occur at the level of transcription (Fig. 1c). Together with the binding of Psp1 to the 5' *Hoxa* cluster (Fig 1a), this suggests that Psp1 has a direct role in regulating expression of *Hottip* lncRNA. Psp1 is also highly expressed in distal limb buds of mouse embryos, where *Hottip* and 5' *Hox* genes are expressed (Fig. S1a)<sup>3</sup>.

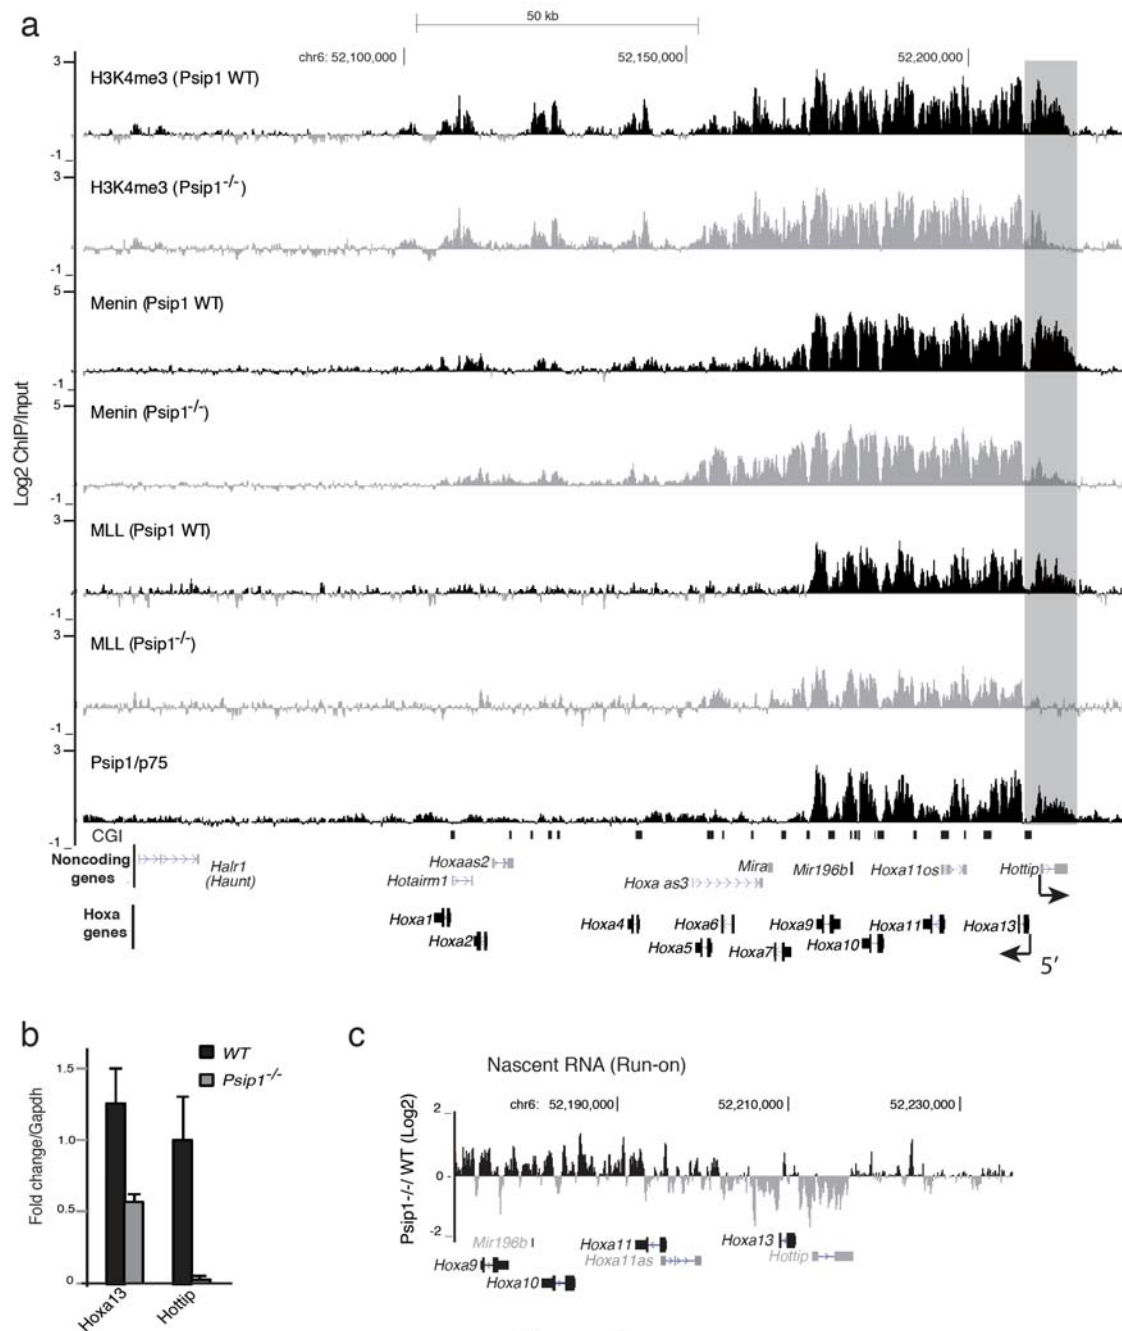

Figure 1

## **Psp1/p52 and Hottip are essential for the maintenance of 5' *Hoxa* gene expression**

To identify which isoform of Psp1 regulates Hottip, two independent lentiviral shRNAs specifically targeting the 3' UTR of p52, C-terminus of p75 and Hottip RNA were transduced into a limb mesenchymal cell line (14FP) which retains the distal

limb-specific expression pattern of *Hox* genes<sup>37</sup>. Knockdown efficiency was confirmed by RT-qPCR analysis (Fig. 2a) and by immunoblotting for Psip1 isoforms (Fig. 2b). Upon specific knockdown of Psip1/p52, expression of 5' *Hoxa* genes - *Hoxa13*, *a11* and *a10* is down regulated with the strongest abrogation of *Hoxa13* mRNA (Fig. 2a). Knockdown of p52 had a strikingly similar effect on 5' *Hoxa* expression as knockdown of *Hottip* (Fig. 2a), a result consistent with the knockdown of human HOTTIP in human foreskin fibroblasts<sup>3</sup>. Knockdown of Psip1/p75 does not affect 5' *Hoxa* genes in these cells, which demonstrates that it is the p52 isoform of Psip1, not p75 that specifically activates *Hottip* lncRNA transcription. Moreover, these data indicates that the *Hottip* lncRNA is involved in maintaining the active chromatin domain at 5' *Hox* genes<sup>3</sup>. Knockdown of *p52*, *p75* and *Hottip* using independent shRNAs confirms that mis-regulation of *Hox* genes is not due to off-target effect of shRNAs (Supplementary Figure 1b).

We found a significant reduction in *Hottip* nascent RNA levels in the p52 knockdown cells (Fig. 2a), which shows that reduced *Hottip* RNA levels are not simply due to the known effect of Psip1/p52 on RNA splicing<sup>34</sup>. Moreover, reduced *Hottip* expression in p52 knockdown cells (shRNA targeting 3' UTR of p52) could be rescued by transducing an shRNA resistant p52 cDNA (Fig. 2c).

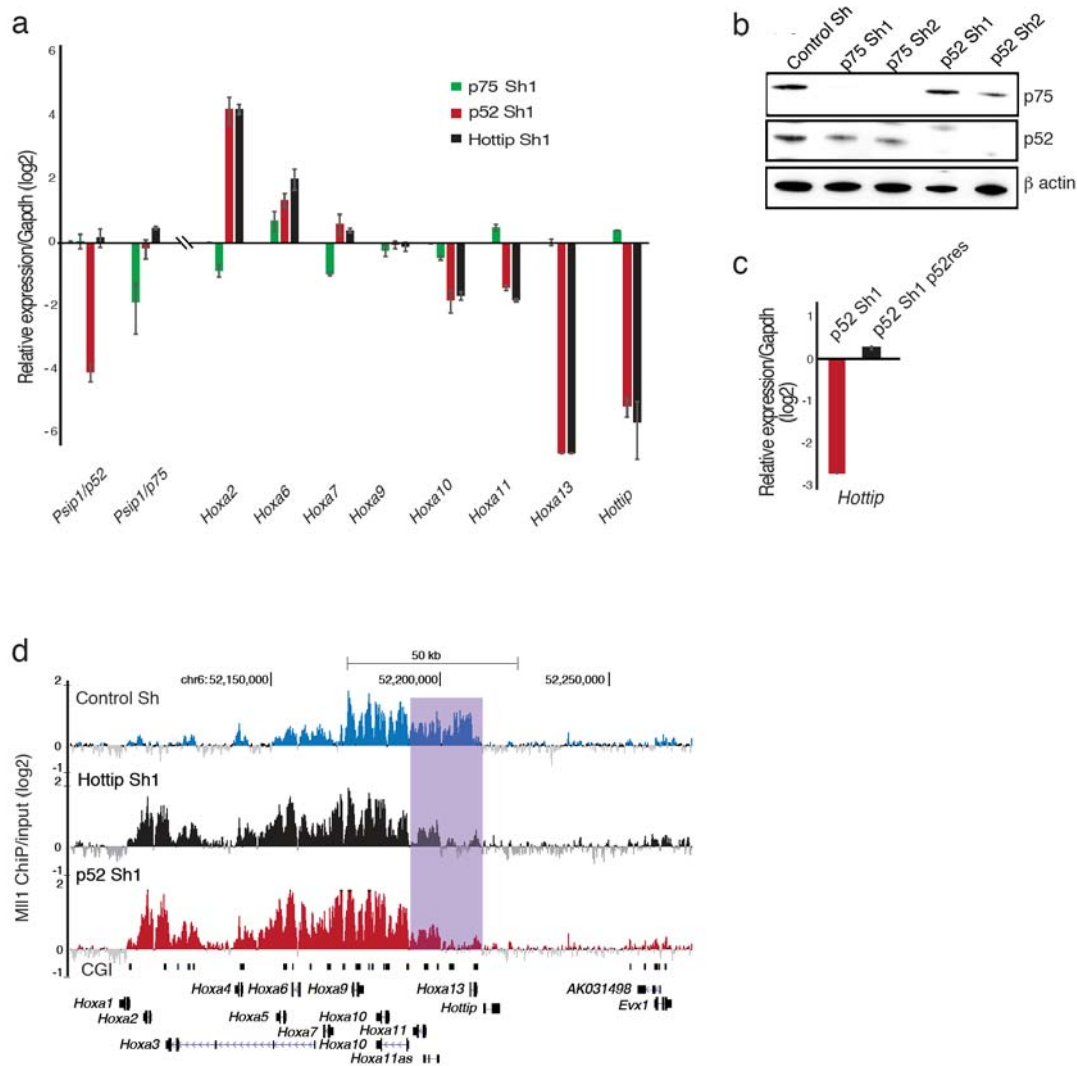

Figure 2

### Mll1 occupancy over *Hoxa* cluster is altered upon *p52* & *Hottip* knockdown

It has been suggested that Hottip has a role in maintaining an MLL complex through interaction with the WDR5 component<sup>3</sup>. Consistent with this, Mll1 occupancy was significantly reduced across 5' *Hoxa* genes upon knockdown of *p52* or *Hottip* compared to control knockdown (Fig. 2d), Intriguingly, upon depletion of *p52* (Fig. 2a and b) and *Hottip* (Fig. 2a), Mll1 was redistributed to 3' *Hoxa* genes, which is consistent with the increase in expression of 3' *Hoxa* genes upon *p52* or *Hottip* depletion (Fig. 2d). Loss of Mll1 upon *p52* and *Hottip* knockdown is consistent with



the reduced *Hottip* expression along with reduced Mll1, H3K4me3 and Menin across *Hoxa13* and *Hottip* loci in *Psip1*<sup>-/-</sup> MEFs (Fig. 1a).

### **Deletion of *Hottip* leads to reduced expression of 5' *Hoxa* genes**

Most lncRNA depletion studies are done by si/sh RNA mediated knockdown, but the conclusions reached have often been different from those after genetic deletion of the loci encoding the lncRNAs<sup>13-15</sup>. We therefore used two pairs of guide RNAs with cas9 nickase (cas9n) to delete the gene body of *Hottip* (*Hottip*Δ) in limb mesenchymal cells, leaving the promoter intact (Fig. 3a). RT-qPCR of *Hoxa* genes in homozygous *Hottip*Δ cells showed a >50% reduction in expression of *Hoxa13* and *a11* (Fig. 3b). Similar to *Psip1* and *Hottip* knock down studies (Fig. 2a), expression of 3' *Hoxa* genes, such *Hoxa2*, *a6* and *a7* increased compared to WT cells.

### ***Hottip* RNA is localized at 5' *Hoxa* genes**

To find the direct targets of *Hottip* lncRNA in limb cells, chromatin isolation by RNA purification (ChIRP)<sup>38</sup> was performed with multiple antisense oligo pools for *Hottip*. RT-qPCR analysis of ChIRPed RNA showed specific enrichment for *Hottip* (Fig. 3c). qPCR analysis of *Hottip* ChIRPed DNA shows specific enrichment of *Hottip* RNA over the promoters of *Hoxa13*, *a11* and *a10* (Fig. 3d). This was abolished in *Hottip*Δ cells demonstrating the specificity of the *Hottip* ChIRP (Fig. 3b). *Hottip* was undetectable across 3' *Hoxa* genes (*a9*, *a7*, *a1*), which are nonetheless upregulated in *Hottip*Δ cells (Fig. 2), demonstrating that misregulation of 3' *Hoxa* genes is a secondary event which does not involve direct binding of *Hottip*.

### **Induction of *Hottip* lncRNA is sufficient to activate 5' *Hoxa* genes**

It was possible that reduced expression of 5' *Hox* genes in *Hottip* $\Delta$  cells is due to loss of *cis* regulatory elements located within the deleted region, rather than due to loss of the *Hottip* RNA, to rule out this possibility we synthetically activated *Hottip* expression in mES cells, by recruiting a catalytically inactive Cas9 (dcas9) fused to a synthetic activator - VP64/VP160 dcas9-VP160 (VP16 x10)<sup>39-42</sup>. CRISPR dCas9 mediated transcriptional activation has been shown to be ineffective when guides are targeted >1kb from TSS<sup>39</sup>. Unlike human HOTTIP which is transcribed bi-directionally from the *HOXA13* CpG island promoter (Fig. 4a)<sup>3</sup>, the Mouse *Hottip* promoter is ~2 kb away from the TSS of *Hoxa13* which allowed us to recruit dcas9-VP160 to the promoter of *Hottip* and not to that of *Hoxa13* (Fig. 4a).

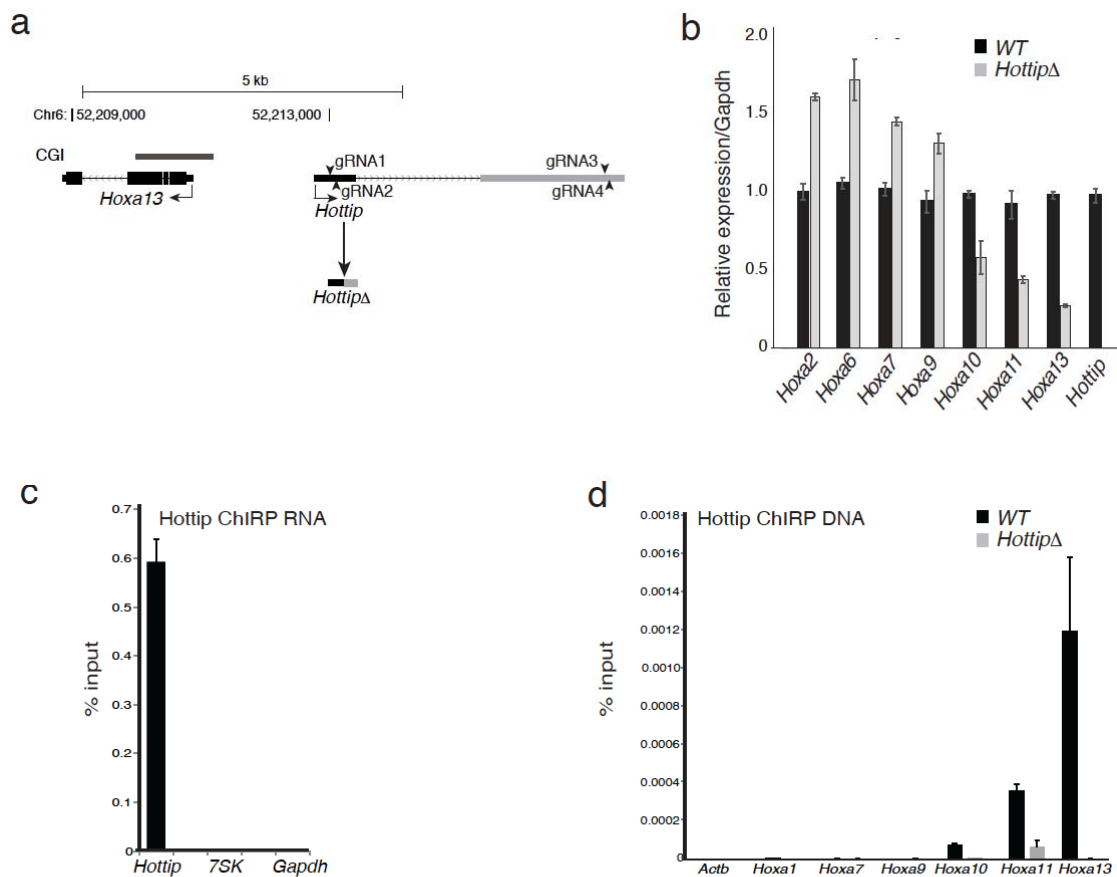

Figure 3

Microarray and RT-qPCR analysis showed specific upregulation of 5' (*a13*, *a11* and *a10*), but not 3', *Hoxa* genes upon *dCas9*-VP160 mediated *Hottip* activation (Fig. 4b & 4c). In contrast, specific recruitment of *dCas9*-VP160 to the *Hoxa13* promoter led to up regulation of only *Hoxa13* - expression of other *Hoxa* genes was unaltered (Fig. 4b). Recruitment of *dCas9*-VP160 to the *Hottip* promoter in *Hottip* $\Delta$  limb cells led to only a modest upregulation of *Hoxa13* compared to WT cells (Fig. 4c), pointing to the importance of *Hottip* RNA in the regulation of *Hoxa* genes.

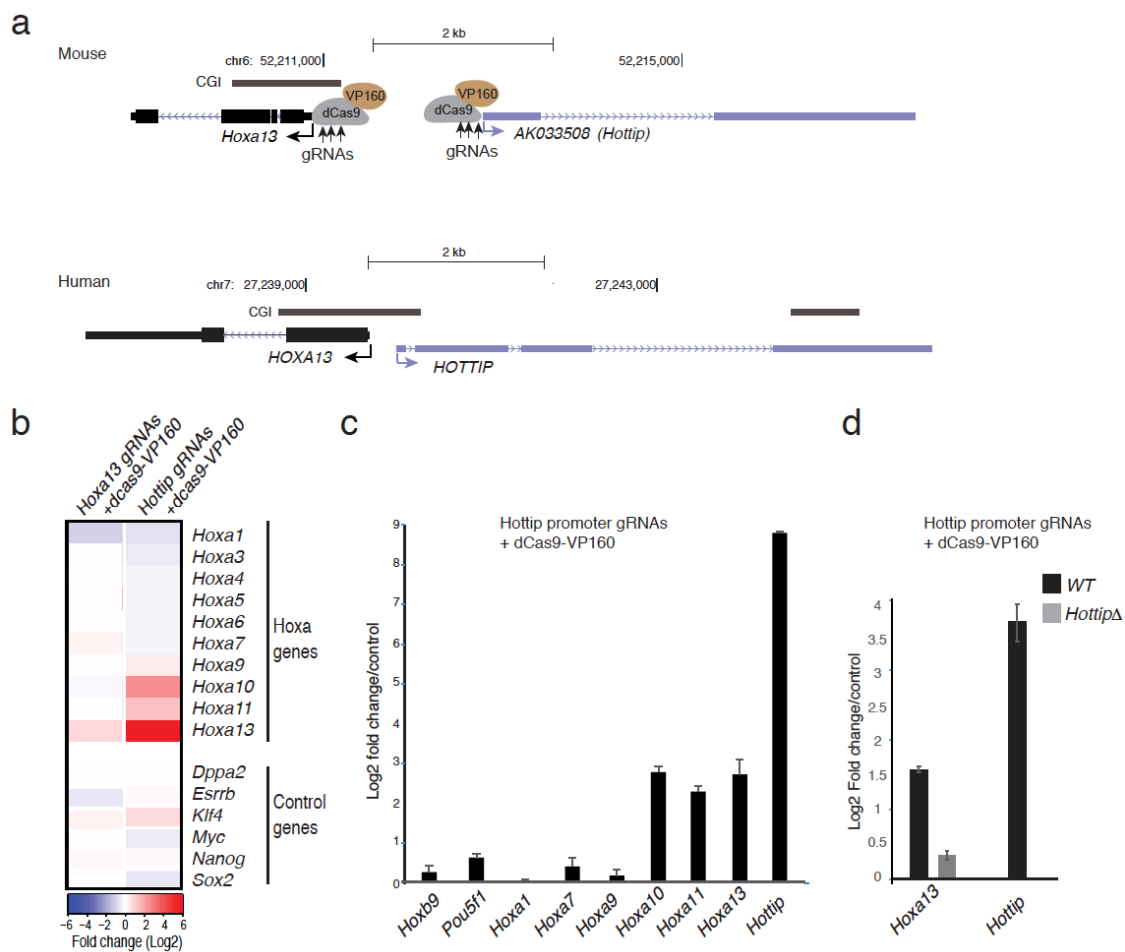

Figure 4

## Discussion

PspI isoforms regulate the expression of *Hox* genes through two distinct mechanisms. We have previously shown that the longer p75 isoform binds directly to

Mll through its MLL or integrase binding domain (IBD) and recruits Mll to active *Hox* clusters<sup>33</sup>. Here we have demonstrated that the shorter isoform Psip1/p52 – that lacks the C-terminal Mll1 binding domain of p75 - controls 5' *Hoxa* genes by activating the expression of *Hottip* lncRNA.

With the recent increase in the number of lncRNAs identified using high-throughput sequencing technologies, the list of these transcripts with unknown upstream transcriptional regulation and downstream functional mechanism is growing. Till date only few proteins have been shown to transcriptionally regulate lncRNAs - Oct4 and Nanog have been shown to directly regulate expression of several lncRNAs in mESCs<sup>43</sup> and p53 induces expression of several lncRNAs including lincRNA-p21<sup>44</sup>. Recently, two micro RNAs miR-192, miR-204 have been demonstrated to post transcriptionally silence the HOTTIP lncRNA, which leads to the reduced viability of Hepatocellular carcinoma (HCC) cells<sup>45</sup>.

Although transcription at noncoding enhancer elements has been associated with enhancer activity<sup>46,47</sup>. Exosome mediated degradation of enhancer transcripts suggests that in most of the cases the process of transcription itself could be sufficient but not functional RNAs<sup>48,49</sup>. Enhancer like function of lncRNAs has been demonstrated in only few cases including HOTTIP<sup>3</sup>.

Together, we demonstrate the specific transcriptional regulation of *Hottip* by a transcriptional coactivator Psip1/p52, which has been shown to have higher in vitro coactivator activity than Psip1/p75 isoform<sup>50</sup>. Increasing evidences shows the existence of specifically regulated lncRNAs at transcriptional and post-transcriptional level. Further research is needed to distinguish the importance of specifically regulated lncRNAs from enhancer like function of the DNA elements at these loci in *cis* regulation of gene expression.

## Acknowledgements

We thank Prof. Alan Engelman (Harvard Medical School) for *Psip1*<sup>-/-</sup> MEFs and the *Psip1/p52* and *Psip1/p75* retroviral rescue plasmids. We thank Prof. Robert Hill (MRC-IGMM, University of Edinburgh) for 14FP cells. This work was funded by Medical Research Council UK and Wellcome Trust (WT085767).

## Methods

### Cell lines:

*Psip1*<sup>-/-</sup> and its corresponding WT MEFs<sup>33,51</sup> were kind gift of Prof. Alan Engelman (Dana-Farber Cancer Institute, USA). Limb mesenchymal cells (14FP) isolated from the posterior mesenchyme of E11.5 mouse embryos from an Immortomouse (H-2kb-tsA58) × CD1 cross, are as previously described<sup>37</sup> and were a kind gift from Robert Hill (University of Edinburgh).

### shRNA knockdown:

Lentiviral shRNAs (pLKO.1 vectors) targeting *Psip1/p52*, *Psip1/p75* and *Hottip* (Supplementary Table 1) were transduced as described by the manufacturer (Sigma Aldrich).

**RTqPCR:** cDNA prepared from superscript II reverse transcriptase was used to perform expression qPCR. All qPCRs were performed with three biological replicates in a LightCycler 480 (LC480, Roche), and the data was normalized to *Gapdh*. Details of the oligos are given in the Supplementary Table 2

### Chromatin Isolation by RNA Purification (ChIRP)

Anti-sense oligo probes tiling the mouse *Hottip* RNA were designed using the web tool from Stellaris FISH Probe Designer

(<https://www.biosearchtech.com/support/education/stellaris-rna-fish>) Biosearch Technologies, CA, USA). Biotinylated oligos were synthesized by Sigma-Aldrich. ChIRP was performed in limb mesenchymal cells as described previously<sup>38</sup>. RNA was isolated from 20% of the ChIRP beads and used for RT-qPCR for *Hottip*, 7sk and *Gapdh* specific primers and rest was used to perform qPCR for *Hoxa* genes. Primer details are given in Supplementary Table 2.

### **RNA In situ**

RNA in situ hybridization for *mHottip* in 10.5 days mouse embryos were performed as previously described<sup>52</sup>. Details of oligos used to PCR amplify *Hottip* cDNA including T7 (sense) and T3 (Antisense) promoter sequences are given in Supplementary Table 3.

**ChIP, antibodies and data analysis:** ChIP was performed as described previously<sup>33</sup>, using antibodies for Mll1 (Active Motif 61295, 61296), ChIP DNA was hybridized to a custom *Hox* array and data was normalized as described previously<sup>33</sup>.

### **CRISPR mediated deletion of *Hottip***

Guide RNAs were designed using Zhang laboratory web tool (<http://crispr.mit.edu>). Paired guide RNAs (gRNAs) (Supplementary Table 4) were designed to target the murine *Hottip* genomic locus beyond the transcription start site (TSS) and before the transcription end site (Figure 2e). gRNAs were cloned into the D10A nickase mutant version of cas9 (cas9n) containing pSpCas9n(BB)-2A-GFP (PX461)<sup>53</sup>. A pool of four

gRNA containing plasmids were transfected into limb cells using FuGENE HD transfection reagent and FACS sorted 48 hours after transfection for GFP<sup>+</sup> cells. Homozygous deletion of *Hottip* was confirmed by PCR and Sanger sequencing, primers used are given in Supplementary Table 2.

### **Cas9-mediated activation of *Hottip* and *Hoxa13***

Guide RNAs targeting the promoters of *Hottip* and *Hoxa13* (Supplementary Table 5) were designed as above and cloned into pSLQ1371<sup>49,54</sup>. gRNA containing plasmids encoding mCherry and puromycin resistance were co-transfected with dCas9-VP160<sup>42</sup>. 24hrs after transfection, transfected cells were selected by addition of 2µg/ml puromycin for another 24 hrs. RNA was extracted 48hrs after transfection for RT-qPCR and microarray gene expression analysis was performed according to the manufacturer's protocol (Agilent Technologies). To investigate whether activation of lncRNA *Hottip* is sufficient to induce the expression of target 5' *Hoxa* genes, 5 guide RNAs targeting the *Hottip* and *Hoxa13* promoters were cotransfected with dCas9-VP160 in mESCs (Supplementary Table 5). Cells were harvested 48hrs after transfection for both RNA expression analyses by RT-qPCR and expression microarrays. Plasmids containing non-targeting guide RNAs and dCas9 alone (*dcas9Δ*) served as controls.

### **Figure Legends**

#### **Figure1**

#### **Reduced *Hottip* expression and MII occupancy in *Psip1*<sup>-/-</sup>**

a) Mean Log<sub>2</sub> ChIP/input for *Psip1*/p75, MII1, Menin and H3K4me3 in WT and *Psip1*<sup>-/-</sup> MEFs over *Hoxa* clusters from custom tiling arrays<sup>33</sup>. Annotated noncoding

transcripts (grey, top) and *Hox* gene transcripts (black) are shown below. (n = 2 biological replicates). Genome co-ordinates are from the mm9 assembly of the mouse genome. Direction of transcription for *Hoxa13* and *Hottip* genes are indicated below.

b) Mean ( $\pm$  s.e.m) expression, assayed by RT-qPCR and normalized to *Gapdh*, of *Hoxa13* and *Hottip* in *WT* and *Psip1*<sup>-/-</sup> MEFs, (n = 3 biological replicates).

c) Log<sub>2</sub> ratio of *Psip1*<sup>-/-</sup> / *WT* run-on transcribed RNA (nascent RNA) over 5' *Hoxa* genes.

### **Figure 2: Psip1/p52 and Hottip are important for expression of 5' Hoxa genes**

a) Log<sub>2</sub> mean ( $\pm$  s.e.m) expression, assayed by RT-qPCR and normalized to *Gapdh*, of *Hoxa* genes, along with *Psip1/p52*, *Psip1/p75*, and *Hottip* RNA, in limb cells transduced with shRNAs targeting p52 (red bars, p52 sh1) p75 (green bars, p75 sh1) and *Hottip* (black bars, *Hottip* sh1) relative to cells transduced with a mammalian non-targeting sh RNA (control) (n = 3 biological replicates).

b) Immunoblotting of limb cells after shRNA knockdown of p52 and p75 *Psip1* isoforms with *Psip1* antibody (A300-847a) which recognizes both p52 and p75<sup>34</sup>.  $\beta$ -actin served as loading control. Two different sets of shRNAs (sh1 in (a) and sh2 in Supplementary Fig. 1) were used for knockdown along with a mammalian non-targeting shRNA as control (control\_sh).

c) Mean log<sub>2</sub> expression of *Hottip*, in limb cells transduced with sh RNAs targeting p52 (red bars, p52 sh1) and those cells rescued transiently with shRNA resistant p52 cDNA (green bars, p52 sh1 p52res). Fold change in expression was normalized to *Gapdh*, relative to mammalian non-targeting shRNA (control) (n = 3 biological replicates).



d) Mean Log<sub>2</sub> ChIP/input across *Hoxa* cluster for MII1 from limb cells transduced with control shRNA (Control\_Sh), shRNA targeting p52 (p52 sh1) and Hottip (Hottip sh1) as described in (a) & (b). Genome co-ordinates are from the mm9 assembly of the mouse genome.

### Figure 3

a) Schematics showing the mouse *Hoxa13* and *Hottip* loci. The CpG Island (CGI) at the *Hoxa13* promoter is shown in a gray bar. Genome co-ordinates are from the mm9 assembly of the mouse genome. Guide RNA binding sites for deletion of *Hottip* are shown as arrow heads. The deletion product of *Hottip* (*Hottip*Δ) is shown below.

b) Mean (± s.e.m) expression, assayed by RT-qPCR and normalized to *Gapdh*, of *Hoxa* genes and *Hottip*, in wild-type (black bars, WT), and *Hottip* knock out (gray bars, *Hottip*Δ) limb mesenchymal cells, (n = 3 biological replicates).

c) RT-qPCR showing mean (± s.e.m) ± percentage (%) enrichment over input for *Hottip*, *7SK* and *Gapdh* RNAs from Hottip ChIRP pulldown from two experiments.

d) qPCR showing mean (± s.e.m) percentage (%) enrichment over input of ChIRPed DNA at promoters of *Actb*, *Hoxa1*, *Hoxa7*, *Hoxa9*, *Hoxa10*, *Hoxa11*, and *Hoxa13* from Hottip ChIRP experiments in wild type (black bars, WT) and Hottip knock out limb mesenchymal cells (grey bars, *Hottip*Δ).

### Figure 4

a) Schematics showing UCSC genomic coordinates of *Hottip* and *Hoxa13* and CpG Islands (CGI) in the mouse (top, mm9) and human (bottom, hg19) genomes. Schematics of guide RNA mediated recruitment of dCas9-VP160 to the *Hottip* promoter is also shown. Direction of transcription is indicated.

b) RT-qPCR data showing mean ( $\pm$  s.e.m) log<sub>2</sub> fold change in expression of *Hottip*, *Hoxa13*, *a11*, *a10*, *a9*, *a7*, *a1*, *Pou5f1* and *Hoxb9* upon guide RNA mediated recruitment of dCas9-VP160 to the *Hottip* promoter (a) in mouse ES cells. Data were normalized to those from a dCas9 control (n= 3 biological replicates)

c) Similar to (b) heat map showing the log<sub>2</sub> mean fold change in expression of *Hoxa* and pluripotency associated genes (control genes) from an expression microarray, upon co-transfection of guide RNAs recognizing the *Hottip* promoter (*Hottip* gRNAs + dCas9-VP160). dCas9-VP160 was also co transfected with guide-RNAs recognizing *Hoxa13* promoter (*Hoxa13* gRNAs + dCas9-VP160).

d) Similar to (b) mean log<sub>2</sub> fold change in *Hottip* and *Hoxa13* expression in wild type ES cells co-transfected with guide-RNAs recognizing the *Hottip* promoter and dCas9-VP160 (Black bars, WT). *Hoxa13* expression in *Hottip* knock out limb mesenchymal cells is also shown (grey bar, *Hottip* $\Delta$ ).

## References

1. Derrien, T. *et al.* The GENCODE v7 catalogue of human long non-coding RNAs: Analysis of their structure , evolution and expression. 1775–1789 (2012). doi:10.1101/gr.132159.111.
2. Khalil, A. M. *et al.* Many human large intergenic noncoding RNAs associate with chromatin-modifying complexes and affect gene expression. *Proc. Natl. Acad. Sci. U. S. A.* **106**, 11667–11672 (2009).
3. Wang, K. C. *et al.* A long noncoding RNA maintains active chromatin to coordinate homeotic gene expression. *Nature* **472**, 120–4 (2011).
4. Yang, L., Froberg, J. E. & Lee, J. T. Long noncoding RNAs: fresh perspectives into the RNA world. *Trends Biochem. Sci.* **39**, 35–43 (2014).

5. Zhao, J., Sun, B. K., Erwin, J. A., Song, J.-J. & Lee, J. T. Polycomb proteins targeted by a short repeat RNA to the mouse X chromosome. *Science* **322**, 750–6 (2008).
6. McHugh, C. A. *et al.* The Xist lncRNA interacts directly with SHARP to silence transcription through HDAC3. *Nature* **521**, 232–236 (2015).
7. Minajigi Anand Froberg John E. , Wei Chunyao, Sunwoo Hongjae, Kesner Barry, Colognori David, Lessing Derek, Payer Bernhard, Boukhali Myriam, Haas Wilhelm, L. J. edited by Jennifer Sills. *Science (80- )*. **329**, 1466–1468 (2010).
8. Rinn, J. L. *et al.* Functional demarcation of active and silent chromatin domains in human HOX loci by noncoding RNAs. *Cell* **129**, 1311–23 (2007).
9. Guttman, M. *et al.* lincRNAs act in the circuitry controlling pluripotency and differentiation. *Nature* **477**, 295–300 (2011).
10. Wang, K. C. & Chang, H. Y. Molecular mechanisms of long noncoding RNAs. *Mol. Cell* **43**, 904–14 (2011).
11. Tan, J. Y. *et al.* Extensive microRNA-mediated crosstalk between lncRNAs and mRNAs in mouse embryonic stem cells. *Genome Res.* 1–12 (2015).  
doi:10.1101/gr.181974.114.
12. Bassett, A. R. *et al.* Considerations when investigating lncRNA function in vivo. *Elife* **3**, e03058 (2014).
13. Schorderet, P. & Duboule, D. Structural and functional differences in the long non-coding RNA hotair in mouse and human. *PLoS Genet.* **7**, e1002071 (2011).
14. Yin, Y. *et al.* Opposing Roles for the lncRNA Haunt and Its Genomic Locus in Regulating HOXA Gene Activation during Embryonic Stem Cell Differentiation.

- Cell Stem Cell* **16**, 504–516 (2015).
15. Zhang, B. *et al.* The lncRNA Malat1 is dispensable for mouse development but its transcription plays a cis-regulatory role in the adult. *Cell Rep.* **2**, 111–23 (2012).
  16. Galupa, R. & Heard, E. X-chromosome inactivation: new insights into cis and trans regulation. *Curr. Opin. Genet. Dev.* **31**, 57–66 (2015).
  17. Keniry, A. *et al.* The H19 lincRNA is a developmental reservoir of miR-675 that suppresses growth and Igf1r. *Nat. Cell Biol.* **14**, 659–665 (2012).
  18. Dey, B. K., Pfeifer, K. & Dutta, A. The H19 long noncoding RNA gives rise to microRNAs miR-675-3p and miR-675-5p to promote skeletal muscle differentiation and regeneration. *Genes Dev.* **28**, 491–501 (2014).
  19. Kanduri, C. Kcnq1ot1: A chromatin regulatory RNA. *Semin. Cell Dev. Biol.* **22**, 343–350 (2011).
  20. Mohammad, F., Mondal, T., Guseva, N., Pandey, G. K. & Kanduri, C. Kcnq1ot1 noncoding RNA mediates transcriptional gene silencing by interacting with Dnmt1. *Development* **137**, 2493–2499 (2010).
  21. Sauvageau, M. *et al.* Multiple knockout mouse models reveal lincRNAs are required for life and brain development. *Elife* **2**, e01749 (2013).
  22. Necsulea, A. *et al.* The evolution of lncRNA repertoires and expression patterns in tetrapods. *Nature* **505**, 635–40 (2014).
  23. Bae, E., Calhoun, V. C., Levine, M., Lewis, E. B. & Drewell, R. A. Characterization of the intergenic RNA profile at abdominal-A and Abdominal-B in the *Drosophila bithorax* complex. *Proc. Natl. Acad. Sci. U. S. A.* **99**, 16847–52 (2002).
  24. Bernstein, B. E. *et al.* Genomic maps and comparative analysis of histone

- modifications in human and mouse. *Cell* **120**, 169–181 (2005).
25. Carninci P, Kasukawa, S, Katayama, J, Gough, M. C, Frith, N, Maeda, R, Oyama, T, Ravasi, B, Lenhard, C, Wells, R, Kodzius, K, Shimokawa, V, B, Bajic, S, E, Brenner, S, Batalov, A, R, R, Forrest, M, Zavolan. The Transcriptional Landscape of the Mammalian Genome. *Science* (80-. ). **309**, 1559–1563 (2006).
26. Drewell, R. A., Bae, E., Burr, J. & Lewis, E. B. Transcription defines the embryonic domains of cis-regulatory activity at the *Drosophila* bithorax complex. *Pnas* **99**, 16853–16858 (2002).
27. Sessa, L. *et al.* Noncoding RNA synthesis and loss of Polycomb group repression accompanies the colinear activation of the human HOXA cluster. *RNA* **13**, 223–239 (2007).
28. Delpretti, S. *et al.* Multiple Enhancers Regulate Hoxd Genes and the Hotdog LncRNA during Cecum Budding. *Cell Rep.* **5**, 137–150 (2013).
29. Li, L. *et al.* Targeted Disruption of Hotair Leads to Homeotic Transformation and Gene Derepression. *Cell Rep.* 1–10 (2013).  
doi:10.1016/j.celrep.2013.09.003
30. Maamar, H., Cabili, M. N., Rinn, J. & Raj, a. linc-HOXA1 is a noncoding RNA that represses Hoxa1 transcription in cis. *Genes Dev.* 1260–1271 (2013).  
doi:10.1101/gad.217018.113
31. Zhang, X. *et al.* A myelopoiesis-associated regulatory intergenic noncoding RNA transcript within the human HOXA cluster. *Blood* **113**, 2526–34 (2009).
32. Sutherland, H. G. *et al.* Disruption of *Ledgf/Psip1* results in perinatal mortality and homeotic skeletal transformations. *Mol. Cell. Biol.* **26**, 7201–7210 (2006).
33. Pradeepa, M. M., Grimes, G. R., Taylor, G. C. a, Sutherland, H. G. &

- Bickmore, W. a. Psp1/Ledgf p75 restrains Hox gene expression by recruiting both trithorax and polycomb group proteins. *Nucleic Acids Res.* **42**, 9021–32 (2014).
34. Pradeepa, M. M., Sutherland, H. G., Ule, J., Grimes, G. R. & Bickmore, W. A. Psp1/Ledgf p52 binds methylated histone H3K36 and splicing factors and contributes to the regulation of alternative splicing. *PLoS Genet.* **8**, e1002717 (2012).
35. Ringrose, L. & Paro, R. Polycomb/Trithorax response elements and epigenetic memory of cell identity. *Development* **134**, 223–232 (2007).
36. Wang, P. *et al.* Global analysis of H3K4 methylation defines MLL family member targets and points to a role for MLL1-mediated H3K4 methylation in the regulation of transcriptional initiation by RNA polymerase II. *Mol. Cell. Biol.* **29**, 6074–85 (2009).
37. Williamson, I. *et al.* Anterior-posterior differences in HoxD chromatin topology in limb development. *Development* **139**, 3157–67 (2012).
38. Chu, C., Quinn, J. & Chang, H. Y. Chromatin Isolation by RNA Purification (ChIRP). *J. Vis. Exp.* 4–9 (2012). doi:10.3791/3912
39. Gilbert, L. a *et al.* CRISPR-mediated modular RNA-guided regulation of transcription in eukaryotes. *Cell* **154**, 442–51 (2013).
40. Gilbert, L. A. *et al.* Genome-Scale CRISPR-Mediated Control of Gene Repression and Activation. *Cell* 1–15 (2014). doi:10.1016/j.cell.2014.09.029
41. Qi, L. S. *et al.* Repurposing CRISPR as an RNA-guided platform for sequence-specific control of gene expression. *Cell* **152**, 1173–83 (2013).
42. Cheng, A. W. *et al.* Multiplexed activation of endogenous genes by CRISPR-on, an RNA-guided transcriptional activator system. *Cell Res.* **23**, 1163–1171

- (2013).
43. Sheik Mohamed, J., Gaughwin, P. M., Lim, B., Robson, P. & Lipovich, L. Conserved long noncoding RNAs transcriptionally regulated by Oct4 and Nanog modulate pluripotency in mouse embryonic stem cells. *RNA* **16**, 324–37 (2010).
  44. Huarte, M. *et al.* A large intergenic noncoding RNA induced by p53 mediates global gene repression in the p53 response. *Cell* **142**, 409–19 (2010).
  45. Ge, Y. *et al.* fMiRNA-192 and miRNA-204 Directly Suppress lncRNA HOTTIP and Interrupt GLS1-Mediated Glutaminolysis in Hepatocellular Carcinoma. *PLoS Genet.* **11**, 1–19 (2015).
  46. Andersson, R. *et al.* An atlas of active enhancers across human cell types and tissues. *Nature* **507**, 455–61 (2014).
  47. Arner, E. *et al.* Transcribed enhancers lead waves of coordinated transcription in transitioning mammalian cells. *Science (80-. ).* **347**, 1010–1015 (2015).
  48. Pefanis, E. *et al.* RNA exosome-regulated long non-coding RNA transcription controls super-enhancer activity. *Cell* **161**, 774–789 (2015).
  49. Pradeepa, M. M. *et al.* Histone H3 globular domain acetylation identifies a new class of enhancers. *Nat. Genet.* (2016). doi:10.1038/ng.3550
  50. Ge, H., Si, Y. & Wolffe, a P. A novel transcriptional coactivator, p52, functionally interacts with the essential splicing factor ASF/SF2. *Mol. Cell* **2**, 751–9 (1998).
  51. Shun, M.-C. *et al.* LEDGF/p75 functions downstream from preintegration complex formation to effect gene-specific HIV-1 integration. *Genes Dev.* **21**, 1767–78 (2007).
  52. Hecksher-Sørensen, J., Hill, R. E. & Lettice, L. Double labeling for whole-

- mount in situ hybridization in mouse. *Biotechniques* **24**, 914–918 (1998).
53. Ran, F., Hsu, P., Wright, J. & Agarwala, V. Genome engineering using the CRISPR-Cas9 system. *Nat. Protoc.* **8**, 2281–308 (2013).
54. Chen, B. *et al.* Dynamic imaging of genomic loci in living human cells by an optimized CRISPR/Cas system. *Cell* **155**, 1479–91 (2013).
